# Supplementary material
Source: PubMed Central journal article supplement (PMC1803724)
Supplement: plntphys_pp.106.087668_1.pdf [file plntphys_pp.106.087668_1.pdf]

**Table S 10**

| <b>Tissue type<br/>(all torpedo<br/>stage)</b> | <b>No. of genes<br/>with a signal<br/>value <math>\geq 40</math></b> | <b>No. of genes<br/>with a signal<br/>value <math>\geq 75</math></b> | <b>Total no. of<br/>genes on ATH1<br/>GeneChip®</b> | <b>% Present at<br/>signal value cut-<br/>off =40</b> | <b>% Present at<br/>signal value cut-<br/>off =75</b> |
|------------------------------------------------|----------------------------------------------------------------------|----------------------------------------------------------------------|-----------------------------------------------------|-------------------------------------------------------|-------------------------------------------------------|
| SAM                                            | 16,023                                                               | 11,189                                                               | 22,746                                              | 70.44                                                 | 49.19                                                 |
| Cotyledon                                      | 13,454                                                               | 8353                                                                 | 22,746                                              | 59.15                                                 | 36.72                                                 |
| Root                                           | 17,479                                                               | 11,690                                                               | 22,746                                              | 76.84                                                 | 51.39                                                 |
