# Supplementary material
Source: PubMed Central journal article supplement (PMC1803724)
Supplement: plntphys_pp.106.087668_2.pdf [file plntphys_pp.106.087668_2.pdf]

**Table S12**

| <b>Gene</b> | <b>Gene symbol</b> | <b>Fold difference</b>                |
|-------------|--------------------|---------------------------------------|
| At2g34650   | <i>PID</i>         | 15x Cot > Root                        |
| At5g18580   | <i>FS1</i>         | 10.1x Cot > Root<br>9.1x Meri > Root  |
| At1g80070   | <i>SUS2</i>        | 5.6x Cot > Root<br>6.1x Meri > Root   |
| At4g30090   | <i>EMB1353</i>     | 11.5x Root > Cot<br>17.8x Meri > Cot  |
| At3g20070   | <i>TTN9</i>        | 6.6x Root > Cot<br>20.2x Meri > Cot   |
| At3g20630   | <i>TTN6</i>        | 4.1x Root > Cot                       |
| At1g62360   | <i>STM</i>         | 62.2x Meri > Cot<br>19.3x Meri > Root |
| At1g78580   | <i>TPS1</i>        | 6.1x Meri > Cot                       |
| At2g21710   | <i>EMB2219</i>     | 5.6x Meri > Cot<br>4.7x Meri > Root   |
| At1g80410   | <i>EMB2753</i>     | 8x Meri > Cot<br>5.1x Meri > Root     |
| At2g31340   | <i>EMB1381</i>     | 4.5x Meri > Cot                       |
| At5g07280   | <i>EXS</i>         | 4.5x Meri > Root                      |
