# Supplementary material
Source: PubMed Central journal article supplement (PMC1803724)

**A**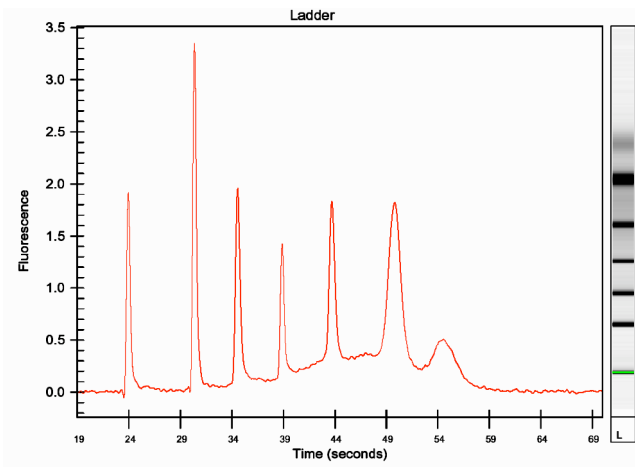**B**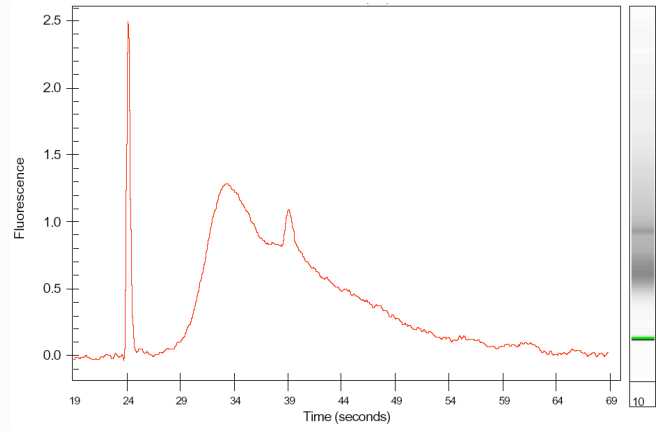**C**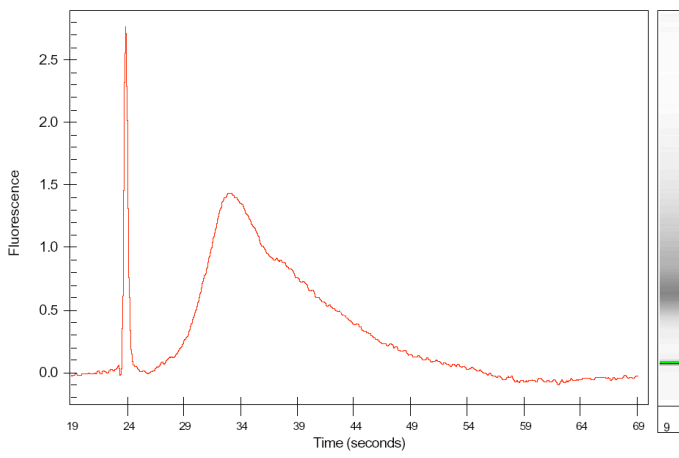**D**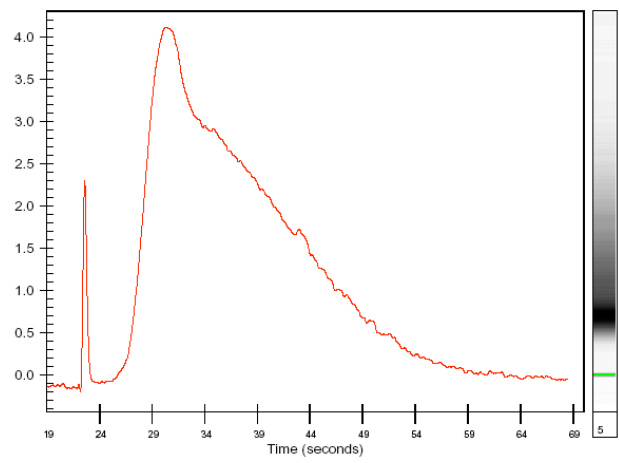

Supplement: plntphys_pp.106.087668_3.pdf [file plntphys_pp.106.087668_3.pdf]

Fig. S2A

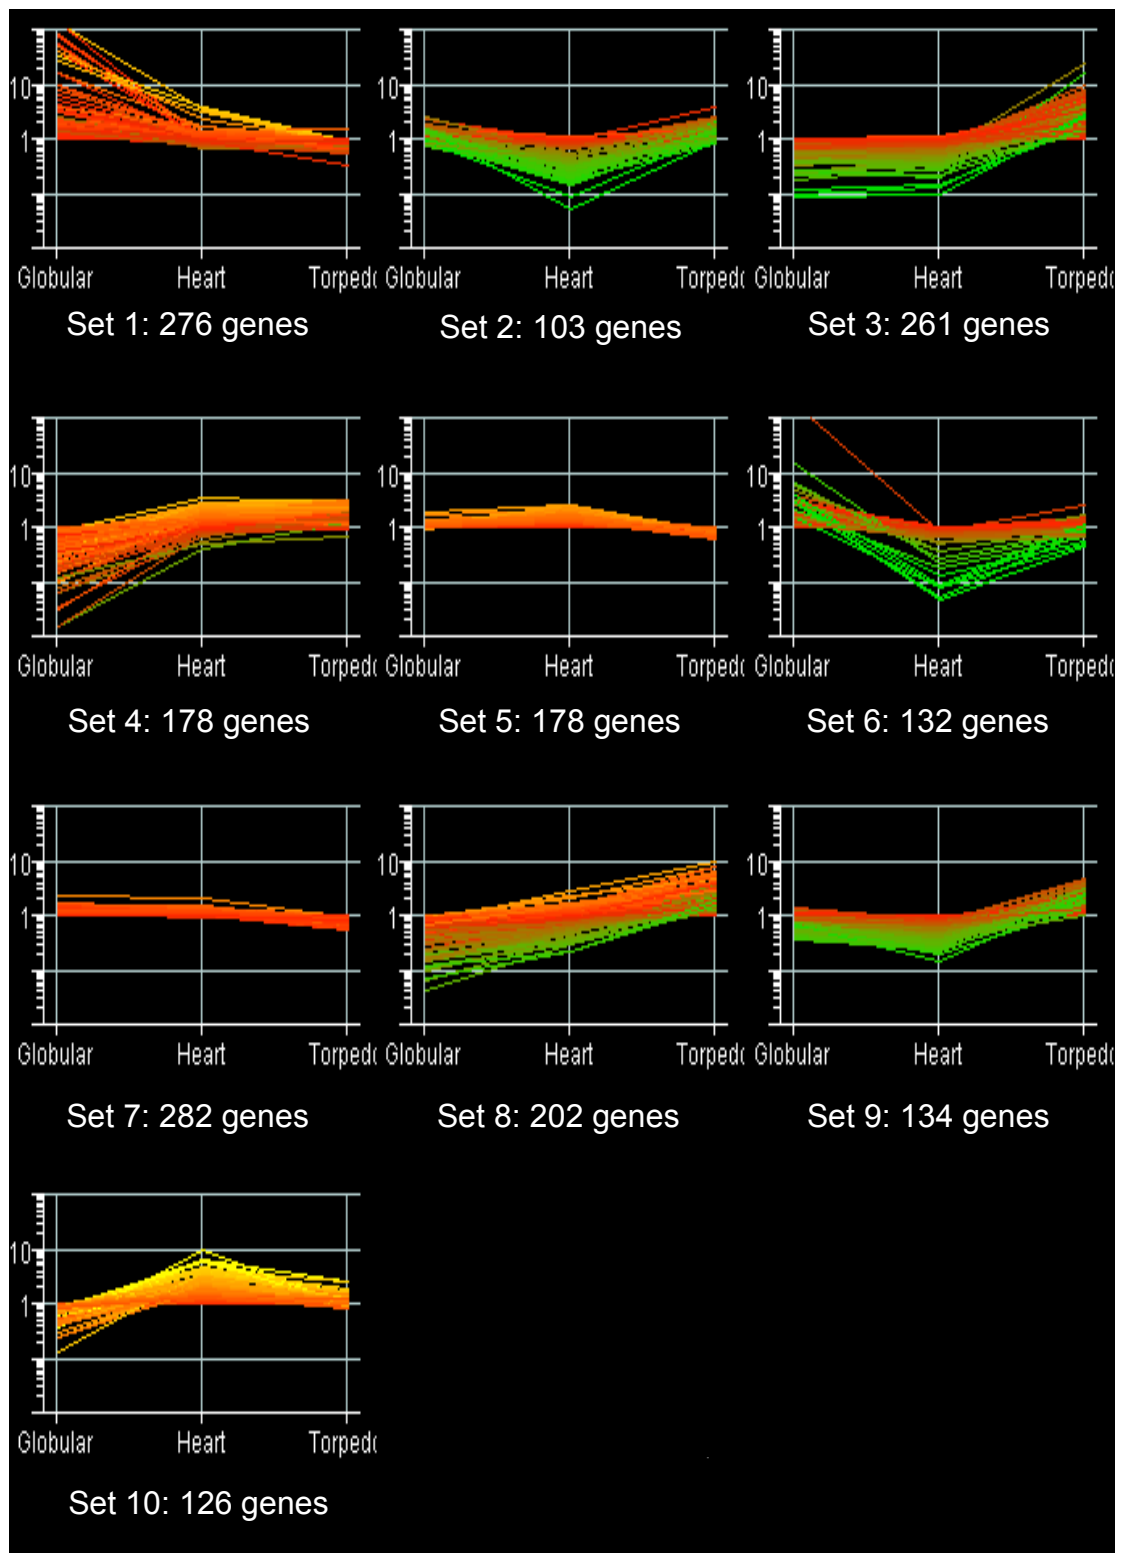

Supplement: plntphys_pp.106.087668_4.pdf [file plntphys_pp.106.087668_4.pdf]

Fig. S2B

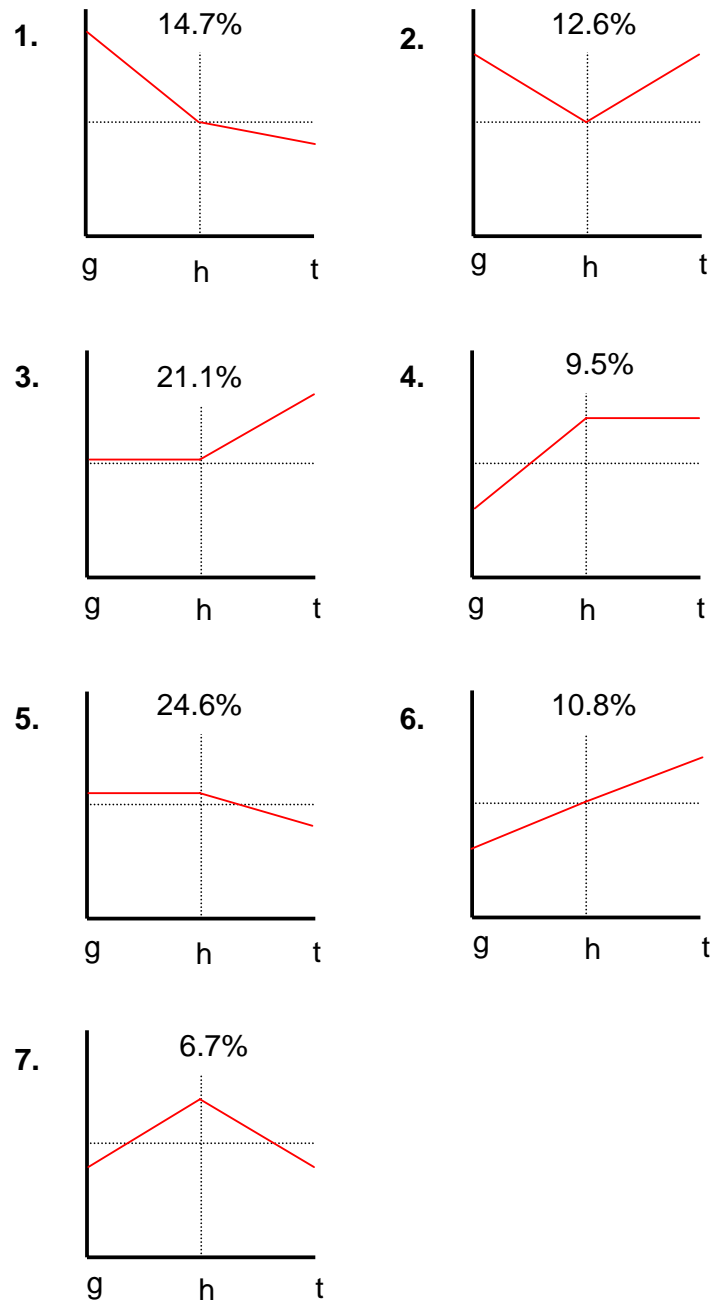

Supplement: plntphys_pp.106.087668_5.pdf [file plntphys_pp.106.087668_5.pdf]

Fig. S3A

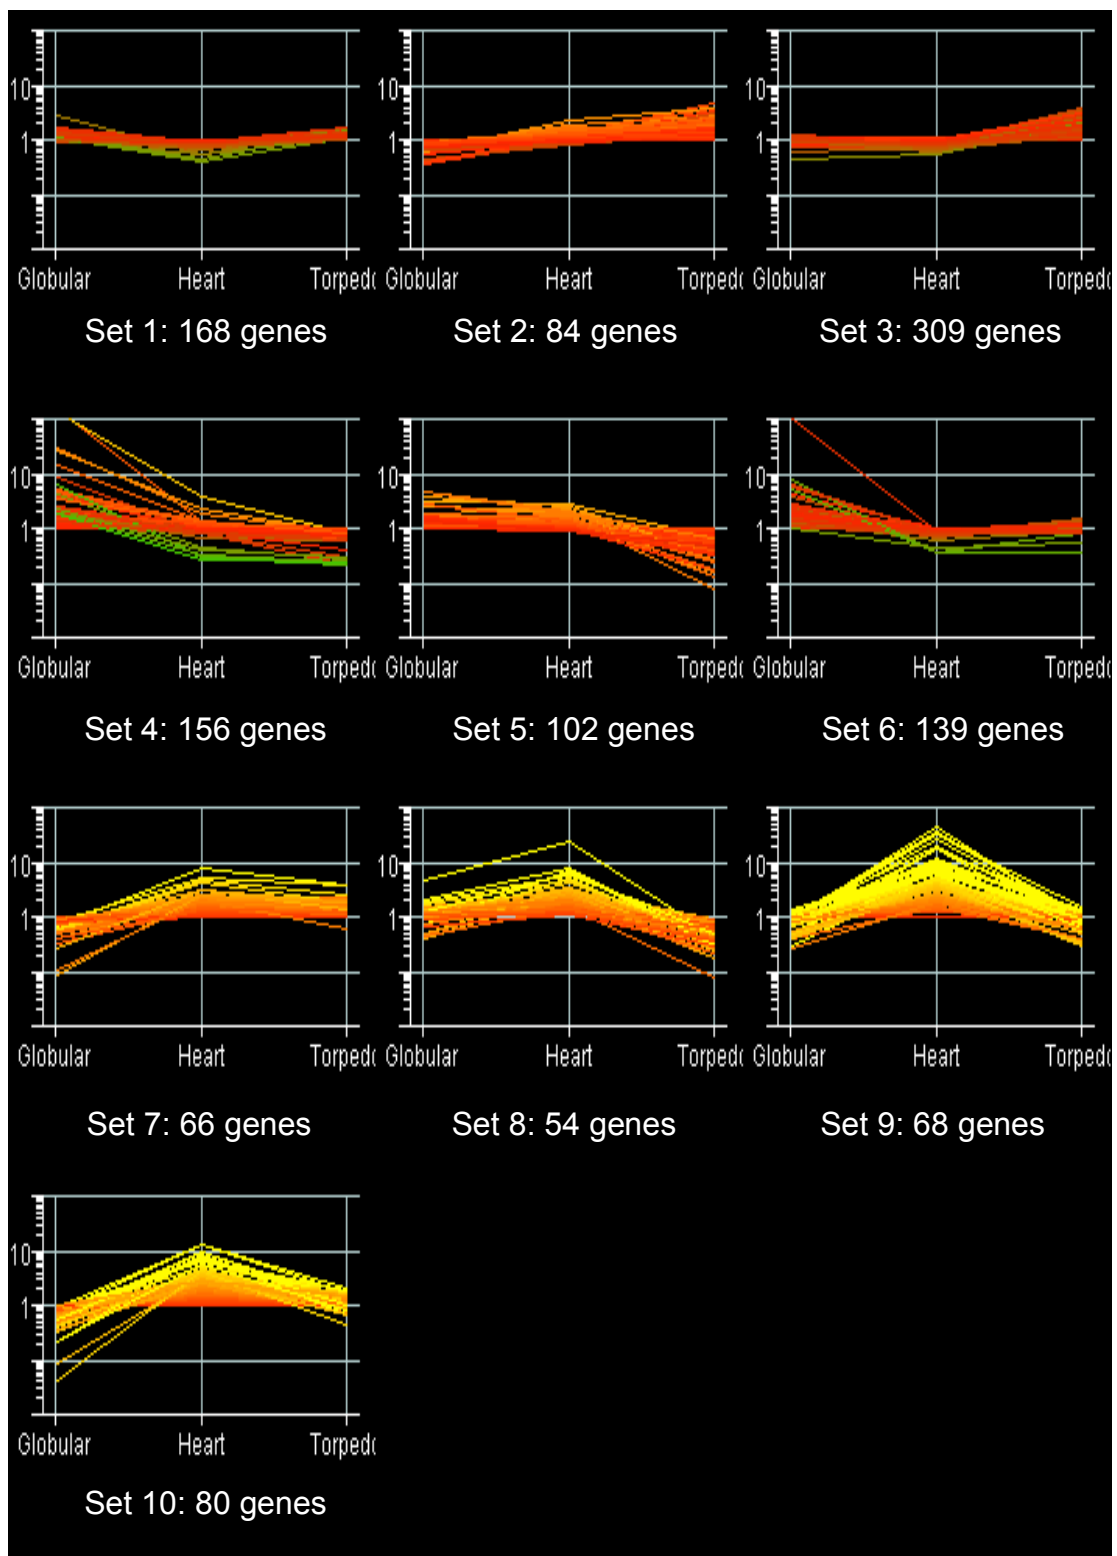

Supplement: plntphys_pp.106.087668_6.pdf [file plntphys_pp.106.087668_6.pdf]

Fig. S3B

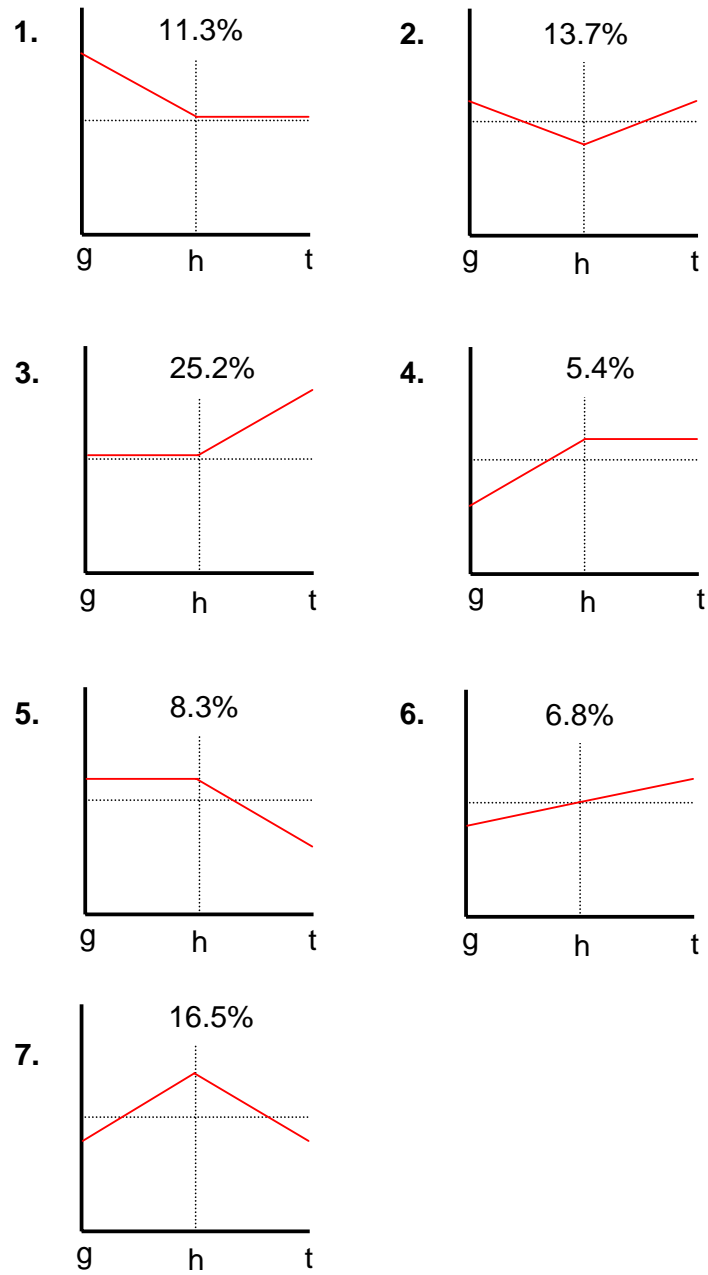

Supplement: plntphys_pp.106.087668_7.pdf [file plntphys_pp.106.087668_7.pdf]
